# Supplementary material for: Sequence Features of Drosha and Dicer Cleavage Sites Affect the Complexity of IsomiRs
Source: Int J Mol Sci. 2015 Apr 10;16(4):8110–27. doi: 10.3390/ijms16048110 (PMC4425070; doi:10.3390/ijms16048110)
Supplement: Supplementary file 1 [file ijms-16-08110-s001.zip › ijms-78242-Supplementary Information-Tables.xlsx]

## Sheet: Table S1
Table S1. p-value for the statistically significant differences that were observed in homogeneous and heterogeneous groups of miRNAs.
main homogeneous miRNA vs background						main homogeneous miRNA vs. main heterogeneous miRNA (#)						main homogeneous miRNA vs. second homogeneous miRNA (*)
5' arm cleavage	Drosha cleavage	Nc	U	4.61451e-06		5' arm cleavage	Drosha cleavage	Nd	G	0.000221639		3' arm cleavage	Drosha cleavage	N5	U	1.76058e-05
		Nc	G	0.000126876			Dicer cleavage	Nf	U	2.69744e-06				N6	G	0.000289661
		Nd	G	3.44018e-05		3' arm cleavage	Drosha cleavage	N6	U	0.000251005
		Nd	C	0.000752436				N7	C	0.000707209
	Dicer cleavage	Nf	U	1.56328e-09				N7	A	0.000307045
		Ng	A	0.000410588
3' arm cleavage	Dicer cleavage	N3	G	0.000556608
		N4	A	0.000347222
	Drosha cleavage	N6	U	0.000776473
		N6	G	0.000556608
		N7	C	4.54535e-05
heterogeneous miRNA population vs. background						second homogeneous miRNA vs. second heterogeneous miRNA (#)						main heterogeneous miRNA vs. second heterogeneous miRNA (*)
5' arm cleavage	Dicer cleavage	Nh	A	0.00053284		5' arm cleavage	Drosha cleavage	Nd	G	3.25388e-06		5' arm cleavage	Dicer cleavage	Nf	G	0.000745834
3' arm cleavage	Dicer cleavage	N3	A	0.000241371			Dicer cleavage	Ng	U	9.93154e-05
						3' arm cleavage	Dicer cleavage	N3	A	8.58698e-05
							Drosha cleavage	N5	U	6.13013e-05
second homogeneous miRNA population vs. background
5' arm cleavage	Drosha cleavage	Nc	U	1.62278e-05
		Nd	G	5.72543e-06
	Dicer cleavage	Ng	U	9.93933e-05
		Nh	G	3.86788e-05
3' arm cleavage	Drosha cleavage	N5	U	5.56588e-06
		N8	C	0.000179371
second heterogeneous miRNA population vs. background
5' arm cleavage	Dicer cleavage	Nc	G	3.86483e-05
3' arm cleavage	Dicer cleavage	N3	A	1.6529e-06

## Sheet: Table S2
Table S2. p-value for the statistically significant differences that were observed between homogeneous and heterogeneous cleavages of Drosha and Dicer.
main cleavage vs. background
Drosha cleavage	5' arm cleavage	Nc	U	1.21646e-11
		Nc	G	3.2595e-11
	3' arm cleavage	N6	G	0.000549032
		N7	C	2.34703e-05
Dicer cleavage	5' arm cleavage	Nf	U	1.58227e-08					`
		Ng	A	0.000261002
	3' arm cleavage	N3	G	0.000549032
second cleavage vs. background
Drosha cleavage	3' arm cleavage	N5	U	1.58547e-05
		N8	C	8.33334e-05
Dicer cleavage	5' arm cleavage	Ne	G	0.000419287
		Ng	U	0.000211822
		Nh	G	8.44646e-05
	3' arm cleavage	N3	A	1.78752e-05
main homogeneous cleavage vs. second homogeneous cleavage (*)
Drosha cleavage	5' arm cleavage	Nb	U	0.000212227
		Nc	G	4.87896e-05
		Nc	U	1.30254e-07
	3' arm cleavage	N5	U	1.65363e-05
		N6	G	0.000246896
Dicer cleavage	3' arm cleavage	N3	A	6.58217e-05
